# Supplementary material for: A dual targeted β-defensin and exome sequencing approach to identify, validate and functionally characterise genes associated with bull fertility
Source: PubMed Central journal article supplement (PMC5613009; doi:10.1038/s41598-017-12498-x), 2017-09-25
Supplement: 41598_2017_12498_MOESM1_ESM.pdf [file 41598_2017_12498_MOESM1_ESM.pdf]

# **A dual targeted $\beta$ -defensin and exome sequencing approach to identify, validate and functionally characterise genes associated with bull fertility**

Ronan Whiston<sup>1✉</sup>, Emma K. Finlay<sup>1✉</sup>, Matthew S. McCabe<sup>1</sup>, Paul Cormican<sup>1</sup>, Paul Flynn<sup>2</sup>, Andrew Cromie<sup>3</sup>, Peter J. Hansen<sup>4</sup>, Alan Lyons<sup>5</sup>, Sean Fair<sup>5</sup>, Patrick Lonergan<sup>6</sup>, Cliona O'Farrelly<sup>7</sup> and Kieran G. Meade<sup>1\*</sup>

Supplementary tables

**Table S1:** Summary statistics for  $\beta$ -defensin sequencing

**Table S2:** Significantly associated SNPs from TS

**Table S3:** Summary statistics for WES

**Table S4:** Significantly associated SNPs from WES

**Table S5:** Gene-ontology analysis of SNPs divergent between fertility groups
